# Supplementary material for: Integrated analysis sheds light on evolutionary trajectories of young transcription start sites in the human genome
Source: PubMed Central journal article supplement (PMC5932608; doi:10.1101/gr.231449.117), 2018-05
Supplement: supp_gr.231449.117_Supplemental_Fig_S2.pdf [file supp_gr.231449.117_Supplemental_Fig_S2.pdf]

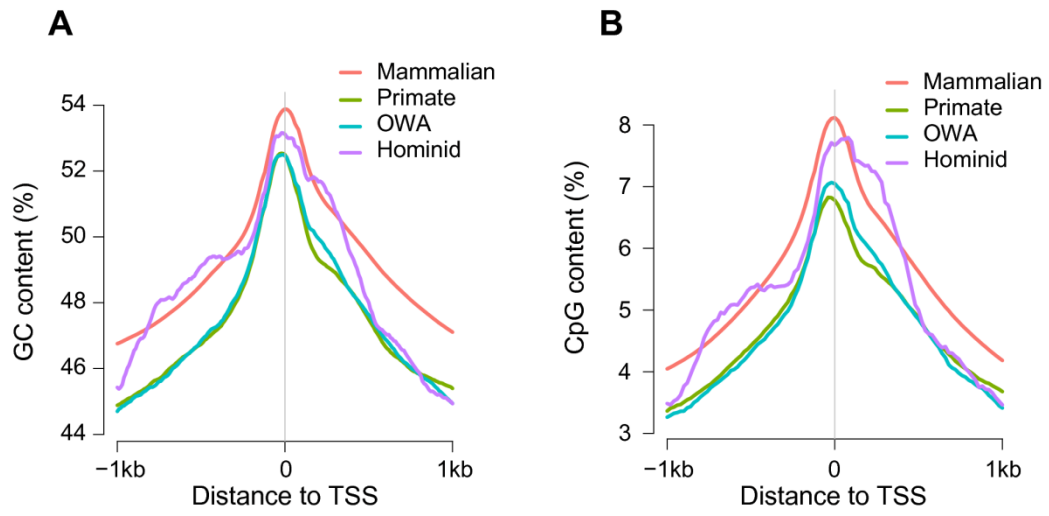

**Supplemental Figure S2 Comparison of GC content (A) and CpG content (B) between four groups.**
