# Supplementary material for: Integrated analysis sheds light on evolutionary trajectories of young transcription start sites in the human genome
Source: PubMed Central journal article supplement (PMC5932608; doi:10.1101/gr.231449.117), 2018-05
Supplement: supp_gr.231449.117_Supplemental_Fig_S4.pdf [file supp_gr.231449.117_Supplemental_Fig_S4.pdf]

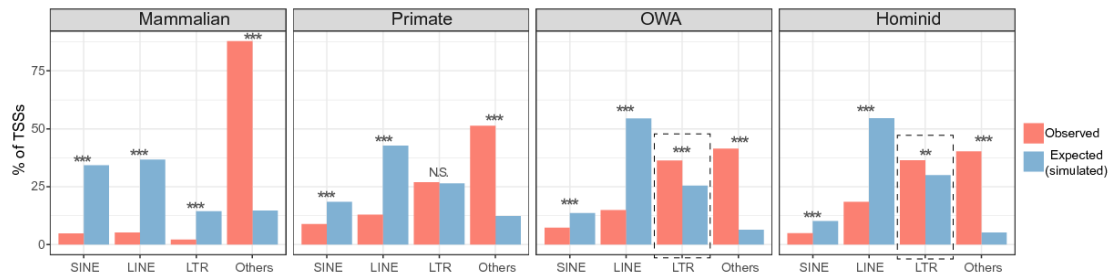

**Supplemental Figure S4 Comparison of observed composition of retrotransposons in each age group of TSSs to the expected composition based on random intervals.** Statistical significance was calculated using Fisher's exact test ("\*\*",  $p < 0.01$ ; "\*\*\*",  $p < 0.001$ ; N.S., not significant).
