# Supplementary material for: Integrated analysis sheds light on evolutionary trajectories of young transcription start sites in the human genome
Source: PubMed Central journal article supplement (PMC5932608; doi:10.1101/gr.231449.117), 2018-05
Supplement: supp_gr.231449.117_Supplemental_Fig_S5.pdf [file supp_gr.231449.117_Supplemental_Fig_S5.pdf]

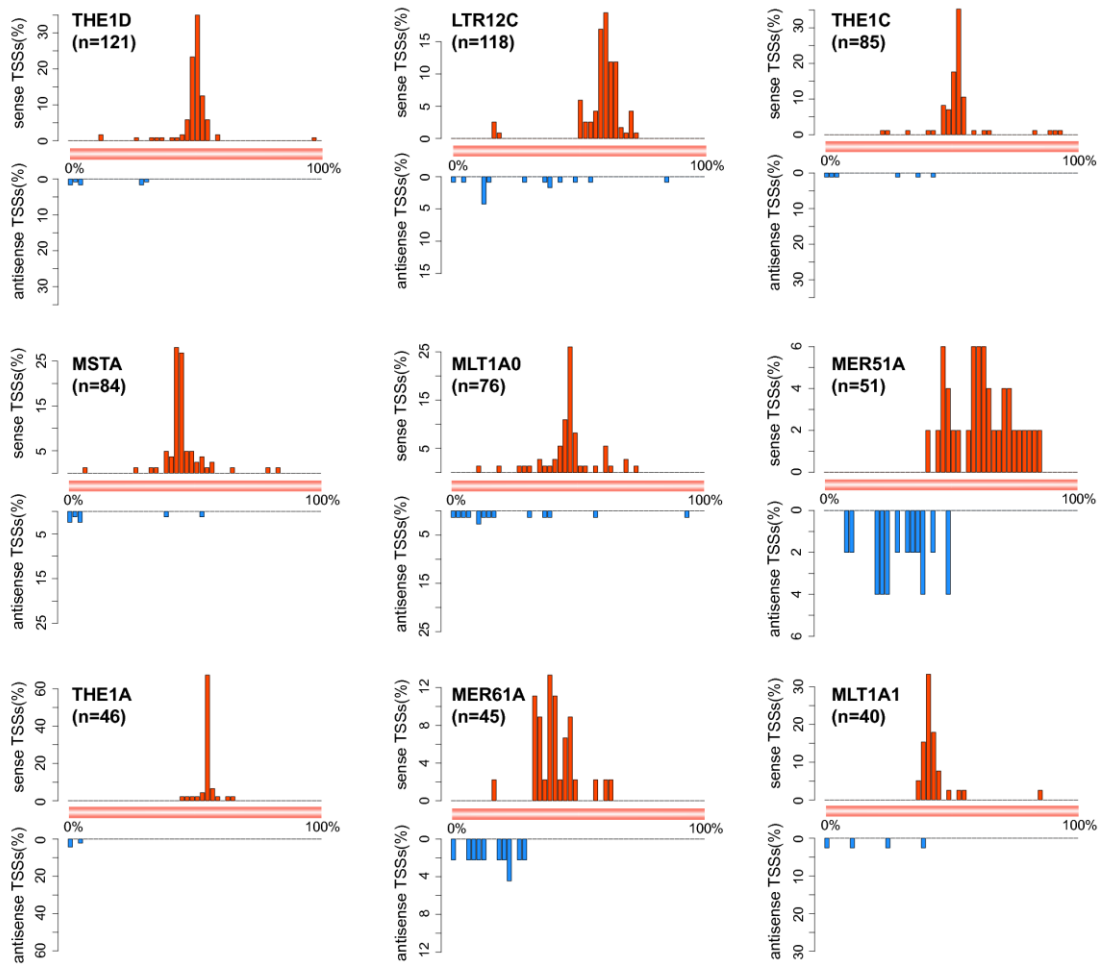

**Supplemental Figure S5 Distribution of young TSSs along LTR subfamilies.** These nine subfamilies are among the top 10 LTR subfamilies which harbor most young TSSs. The tenth, THE1B, has already been shown in **Fig. 2b**. Number of young TSSs for each subfamily is given in the bracket.
