# Supplementary material for: Integrated analysis sheds light on evolutionary trajectories of young transcription start sites in the human genome
Source: PubMed Central journal article supplement (PMC5932608; doi:10.1101/gr.231449.117), 2018-05
Supplement: supp_gr.231449.117_Supplemental_Fig_S6.pdf [file supp_gr.231449.117_Supplemental_Fig_S6.pdf]

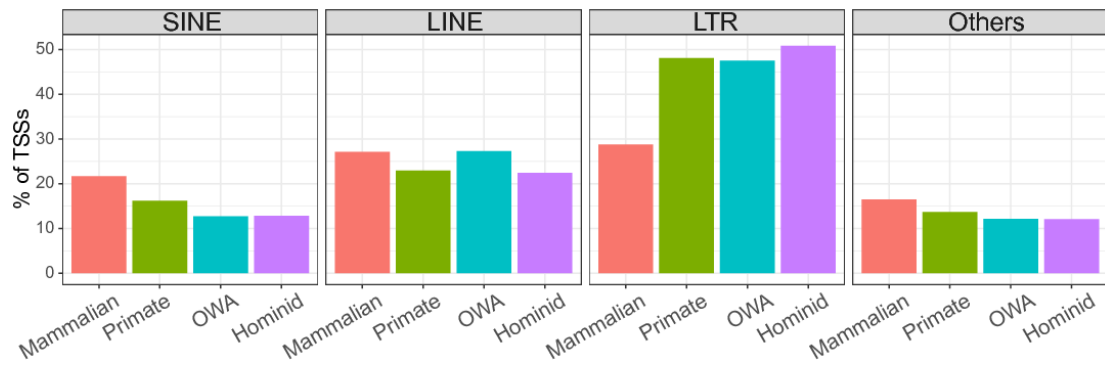

**Supplemental Figure S6 Percentages of TSSs associated with different retrotransposons which contain a TATA-box motif starting at 25-35 bp upstream regions of the dominant TSSs.**
