# Supplementary material for: Integrated analysis sheds light on evolutionary trajectories of young transcription start sites in the human genome
Source: PubMed Central journal article supplement (PMC5932608; doi:10.1101/gr.231449.117), 2018-05
Supplement: supp_gr.231449.117_Supplemental_Fig_S8.pdf [file supp_gr.231449.117_Supplemental_Fig_S8.pdf]

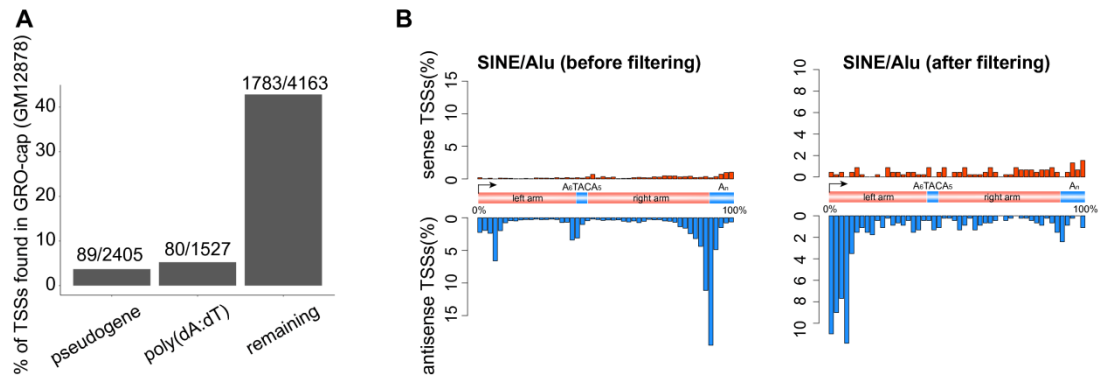

**Supplemental Figure S8 Putative false positives associated with pseudogenes and poly(dA:dT) tracts in FANTOM 5 TSSs.** (A) Percentages of FANTOM 5 TSSs of GM12878 found in GRO-cap defined TSSs of GM12878 (from Core et al. 2014), based on the FANTOM TSSs found only in primate lineages. A FANTOM TSS is considered to be found in the GRO-cap dataset if it is within 100 bp of a GRO-cap TSS. (B) Distribution of FANTOM 5 TSSs along the *Alu* consensus element before and after filtering the suspicious TSSs.
