# Supplementary material for: Integrated analysis sheds light on evolutionary trajectories of young transcription start sites in the human genome
Source: PubMed Central journal article supplement (PMC5932608; doi:10.1101/gr.231449.117), 2018-05
Supplement: supp_gr.231449.117_Supplemental_Fig_S11.pdf [file supp_gr.231449.117_Supplemental_Fig_S11.pdf]

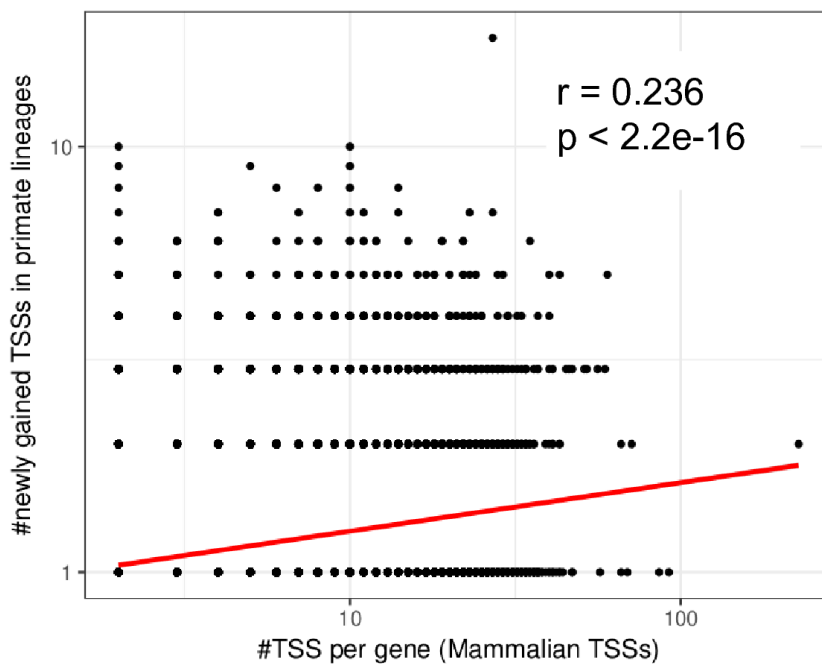

**Supplemental Figure S11 Relationship between the number of old (‘mammalian’) TSSs per gene and the number of newly gained TSSs in primate lineages, on a  $\log_{10}$  scale.** The red line is derived from linear regression based on the data points. Pearson’s  $r$  and the corresponding  $p$ -value are also shown in the figure.
