# Supplementary material for: Integrated analysis sheds light on evolutionary trajectories of young transcription start sites in the human genome
Source: PubMed Central journal article supplement (PMC5932608; doi:10.1101/gr.231449.117), 2018-05
Supplement: supp_gr.231449.117_Supplemental_Fig_S16.pdf [file supp_gr.231449.117_Supplemental_Fig_S16.pdf]

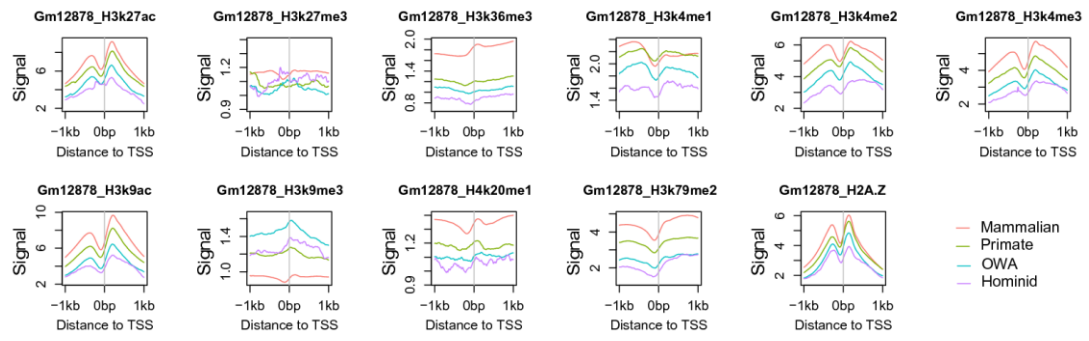

**Supplemental Figure S16 Meta-profiles for histone modifications in GM12878, supplementary to that shown in Fig. 4.** All the data was obtained from ENCODE project.
