# Supplementary material for: Integrated analysis sheds light on evolutionary trajectories of young transcription start sites in the human genome
Source: PubMed Central journal article supplement (PMC5932608; doi:10.1101/gr.231449.117), 2018-05
Supplement: supp_gr.231449.117_Supplemental_Fig_S18.pdf [file supp_gr.231449.117_Supplemental_Fig_S18.pdf]

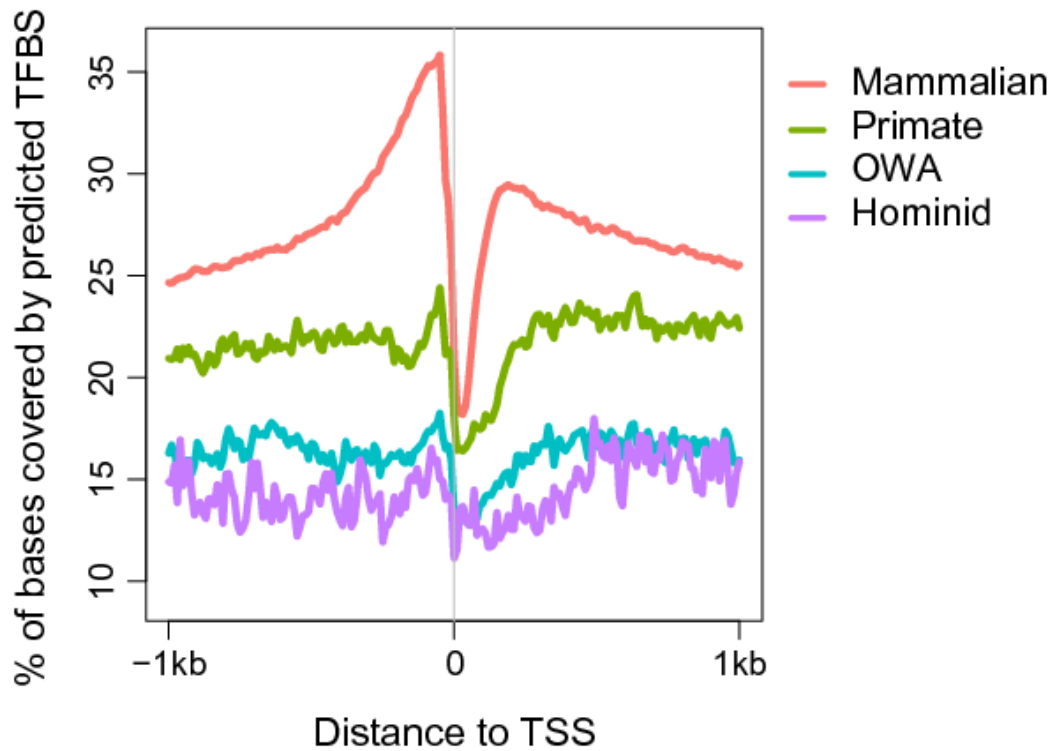

**Supplemental Figure S18 Comparison of the coverage by computationally predicted TFBSs between four TSS groups.** The computationally predicted TFBSs in human genome were from ENCODE project (<http://compbio.mit.edu/encode-motifs/>). Note that the TFBSs predicted by computational methods are based on binding motifs, usually smaller than the called peaks in the TF ChIP-seq data that were used for generating **Fig. 4**.
