# Supplementary material for: Integrated analysis sheds light on evolutionary trajectories of young transcription start sites in the human genome
Source: PubMed Central journal article supplement (PMC5932608; doi:10.1101/gr.231449.117), 2018-05
Supplement: supp_gr.231449.117_Supplemental_Fig_S19.pdf [file supp_gr.231449.117_Supplemental_Fig_S19.pdf]

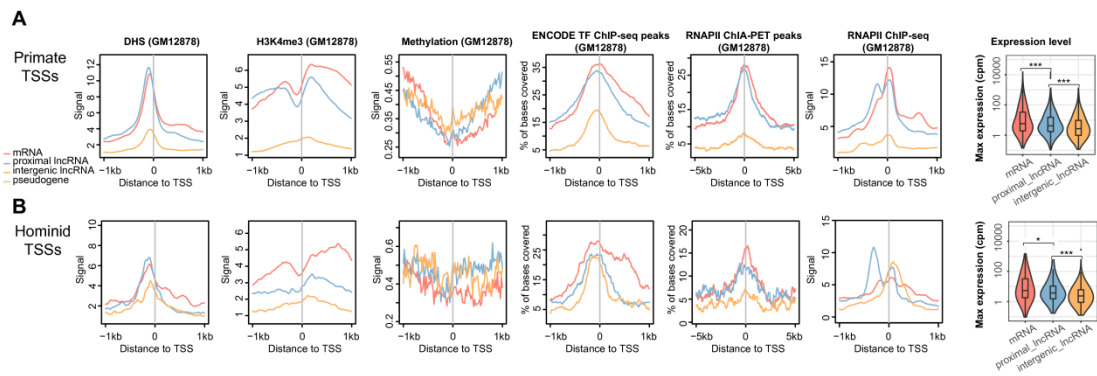

**Supplemental Figure S19 Meta-profiles of functional signatures in GM12878 cell line for different TSS subgroups, defined by transcript types. (A) For ‘primate’ TSS subgroups. (B) For ‘hominid’ TSS subgroups. Statistical significance was calculated using the one-tailed Wilcoxon rank sum tests (“\*”,  $p < 0.05$ ; “\*\*”,  $p < 0.01$ ; “\*\*\*”,  $p < 0.001$ ).**
