# Supplementary material for: Integrated analysis sheds light on evolutionary trajectories of young transcription start sites in the human genome
Source: PubMed Central journal article supplement (PMC5932608; doi:10.1101/gr.231449.117), 2018-05
Supplement: supp_gr.231449.117_Supplemental_Fig_S22.pdf [file supp_gr.231449.117_Supplemental_Fig_S22.pdf]

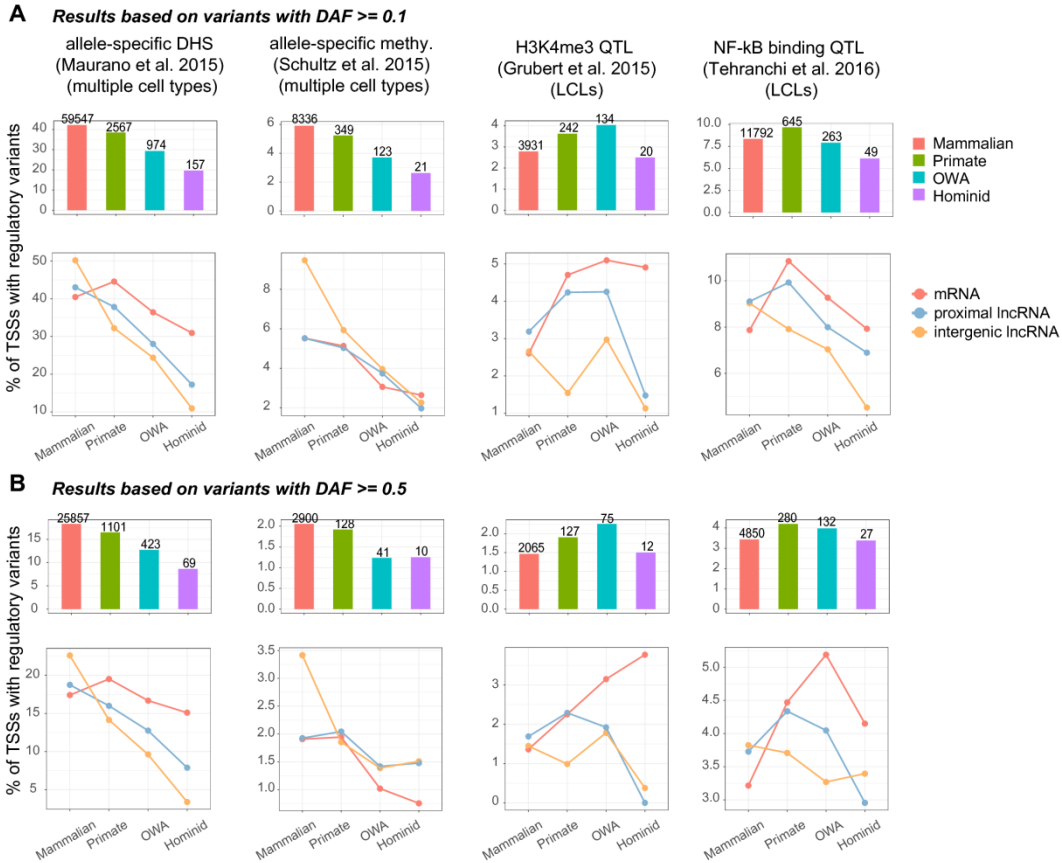

**Supplemental Figure S22 Proportions of TSSs harboring regulatory variants within TSS $\pm$ 1kb in different TSS groups, based on variants with higher thresholds of derived allele frequency (DAF). (A) Results based on variants with DAF  $\geq 0.1$ . (B) Results based on variants with DAF  $\geq 0.5$ . Above the bars are the numbers of TSSs with regulatory variants. Note that for the results based on variants with DAF  $\geq 0.5$ , the numbers of regulatory variants found in the TSS groups/subgroups are very small, so the changing trends shown in the some panels for different transcript types may not accurately reflect actual trends. LCLs, lymphoblastoid cell lines.**
